# Supplementary material for: Rapid colorimetric sensing of chlorpromazine HCl antipsychotic through in situ growth of gold nanoparticles
Source: Royal Society of Chemistry journal article supplement (doi:10.1039/d3ra05516g), 2024-01-01
Supplement: d3ra05516g1.pdf [file d3ra05516g1.pdf]

Table 1S. The statistical summary data of the linear regression line for the turbidimetric determination of CPZ by the colorimetric assay

| Parameter                                  | CPZ                                         |
|--------------------------------------------|---------------------------------------------|
| Linearity ( $\mu\text{g mL}^{-1}$ )        | 0.1-30                                      |
| Regression equation                        | $0.3673 \pm 0.00126 + 0.0547 \pm 0.0009x^a$ |
| Slope                                      | $0.0547 \pm 0.0009$                         |
| Intercept                                  | $0.3673 \pm 0.00126$                        |
| Correlation coefficient, r                 | 0.9983                                      |
| coefficient of determination, $r^2$        | 0.9967                                      |
| LOD ( $\mu\text{g mL}^{-1}$ ) <sup>b</sup> | 0.069                                       |
| LOQ ( $\mu\text{g mL}^{-1}$ ) <sup>c</sup> | 0.23                                        |
| % RSD <sup>d</sup>                         | 1.52                                        |
| % E <sup>e</sup>                           | 0.51                                        |

<sup>a</sup> The detector signal in mV for the concentration of X  $\mu\text{g mL}^{-1}$

<sup>b</sup> Limit of detection

<sup>c</sup> Limit of quantification

<sup>d</sup> Relative standard deviation percentage for three replicate samples

<sup>e</sup> Error percentage for three replicate samples

Table 2S. The intra and inter-day precision of the developed colorimetric assay.

| [CPZ] $\mu\text{g mL}^{-1}$  | Found [CPZ $\pm$ SD <sup>a</sup> ] $\mu\text{g mL}^{-1}$ | RSD% |
|------------------------------|----------------------------------------------------------|------|
| <b>Intra-day (n=6)</b>       |                                                          |      |
| 10                           | 10.221                                                   | 1.22 |
| 20                           | 30.211                                                   | 2.65 |
| <b>Inter-day one (n=6)</b>   |                                                          |      |
| 10                           | 10.3143 $\pm$ 0.0717                                     | 1.81 |
| 20                           | 20.522 $\pm$ 0.8424                                      | 0.93 |
| <b>Inter-day two (n=6)</b>   |                                                          |      |
| 10                           | 10.2141 $\pm$ 0.3411                                     | 2.54 |
| 20                           | 20.7855 $\pm$ 0.4262                                     | 3.10 |
| <b>Inter-day three (n=6)</b> |                                                          |      |
| 10                           | 10.2331 $\pm$ 0.3315                                     | 2.98 |
| 20                           | 20.0855 $\pm$ 0.2145                                     | 1.54 |

<sup>a</sup> The average of five replicate analyses

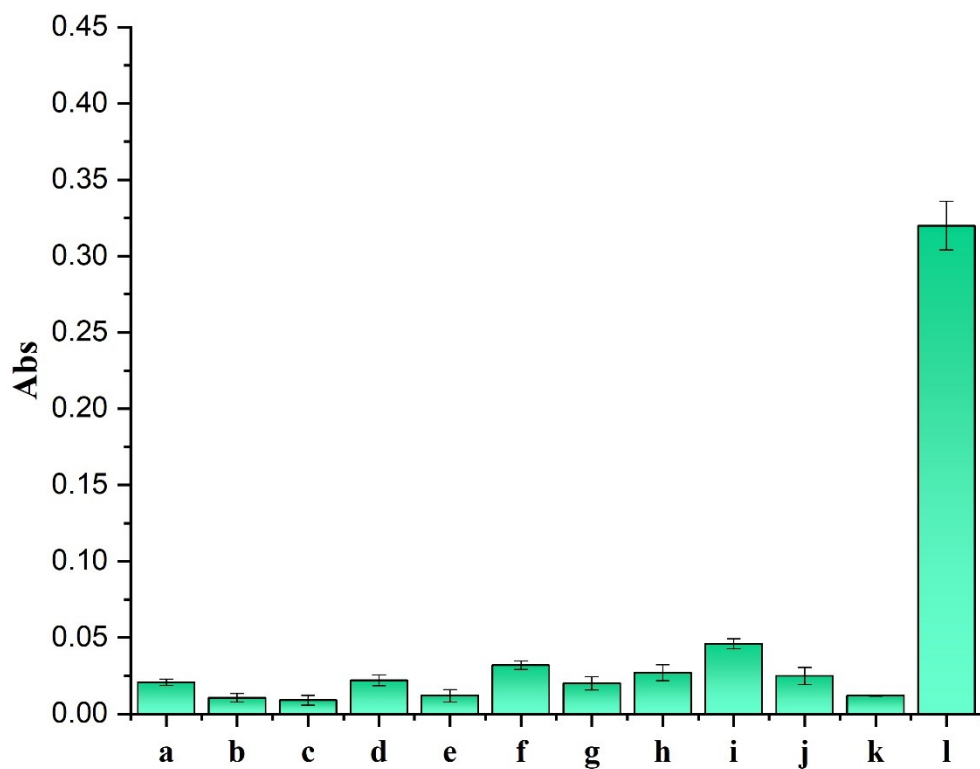

Figure 1S: The absorbance at 527 nm under optimum conditions upon addition the followings: (a) methanol (1:4 v/v), (b) ethanol (1: 4 v/v), (c) creatinine (1000  $\mu\text{g}/\text{mL}$ ), (d) uric acid (1000  $\mu\text{g}/\text{mL}$ ), (e) urea (1000  $\mu\text{g}/\text{mL}$ ), (f) xanthine (1000  $\mu\text{g}/\text{mL}$ ), (g) catechol (1000  $\mu\text{g}/\text{mL}$ ), (h) lactose (1000  $\mu\text{g}/\text{mL}$ ), (i) sucrose (1000  $\mu\text{g}/\text{mL}$ ), (j), glucose (1000  $\mu\text{g}/\text{mL}$ ), (k) fructose (1000  $\mu\text{g}/\text{mL}$ ), (l) ascorbic acid (5000  $\mu\text{g}/\text{mL}$ ).
